# Supplementary material for: Investigating the Potential Shared Molecular Mechanisms between COVID-19 and Alzheimer’s Disease via Transcriptomic Analysis
Source: Viruses. 2024 Jan 9;16(1):100. doi: 10.3390/v16010100 (PMC10821526; doi:10.3390/v16010100)
Supplement: Supplementary file 1 [file viruses-16-00100-s001.zip › Table S1.xlsx]

## Sheet: dataset
Disease Type	Dataset ID	Data Type	Tissues/Cells	n Samples	Used in This Study	Concentration	Ref	PMID
AD	GSE95587	RNA-Seq	Fusiform gyrus	117	117		Friedman BA, et al. Cell Rep. 2018	29346778
AD	GSE150696	Microarray	Brain	42	18		Low CYB, et al. Brain Pathol. 2021	33128789
AD	GSE15222	Microarray	Cortical	363	363		Webster JA, et al. Am J Hum Genet. 2009	19361613
AD	GSE1297	Microarray	Hippocampal	31	31		Blalock EM, et al. Proc Natl Acad Sci U S A. 2004	14769913
AD	GSE33000	Microarray	prefrontal cortex brain	624	467		Narayanan M, et al. Mol Syst Biol. 2014	25080494
AD	GSE36980	Microarray	hippocampi	80	18		Hokama M, et al. Cereb Cortex. 2014	23595620
AD	GSE37263	Microarray	grey matter	16	16		Tan MG, et al. J Neurosci Res. 2010	19937809
AD	GSE29378	Microarray	hippocampus	63	63		Miller JA, et al. Genome Med. 2013	23705665
SARS-CoV2	GSE147507	RNA-Seq	Calu-3	110	6	24hpi, 2 MOI	Blanco-Melo D, et al. Cell. 2020	32416070
SARS-CoV2	GSE147507	RNA-Seq	NHBE	110	6	24hpi, 2 MOI	Blanco-Melo D, et al. Cell. 2020	32416070
SARS-CoV2	GSE147507	RNA-Seq	Lung	110	4	24hpi, 2 MOI	Blanco-Melo D, et al. Cell. 2020	32416070
SARS-CoV2	GSE147507	RNA-Seq	A549	110	6	24hpi, 2 MOI	Blanco-Melo D, et al. Cell. 2020	32416070
SARS-CoV2	GSE152641	RNA-Seq	Whole Blood	86	86		Thair SA, et al. iScience. 2021	33437935
SARS-CoV2	GSE167000	RNA-Seq	Whole Blood	95	95		Galbraith MD, et al. Elife. 2021	33724185
SARS-CoV2	GSE182297	RNA-Seq	Brain	22	4		Pujadas E, et al. Am J Pathol. 2021	34506752
SARS-CoV2	GSE159812	snRNA-seq	Brain	30	30		Yang AC, et al. Nature. 2021	34153974
SARS-CoV2	GSE188847	RNA-Seq	Frontal cortex of brain	94	45		Mavrikaki M, et al. Nat Aging. 2022	37118539
SARS-CoV2	GSE205099	RNA-Seq	Lung	16	16		Erjefält JS,et al. EBioMedicine. 2022	36027872
SARS-CoV1	GSE17400	Microarray	Calu-3	27	6	24hpi, 0.1 MOI	Yoshikawa T, et al. PLoS One. 2010	20090954
SARS-CoV1	GSE33267	Microarray	Calu-3	99	6	24hpi, 5 MOI	Sims AC, et al. J Virol. 2013	23365422
SARS-CoV1	GSE45042	Microarray	Calu-3 2B4	32	6	24 hpi, 5MOI	Josset L, et al. mBio. 2013	23631916
MERS	GSE122876	RNA-Seq	Calu-3	9	6	24hpi, 2 MOI	Yuan S, et al. Nat Commun. 2019	30631056
MERS	GSE65574	Microarray	Calu-3	95	6	24hpi, 5 MOI	Menachery VD, et al. mBio. 2017	28830941
MERS	GSE81909	Microarray	Human airway epithelial cells	50	10	24hpi, 5 MOI	Feng S, et al. BMC Bioinformatics. 2021	34051754
HIV	GSE139327	RNA-Seq	PBMC	28	7		Muema DM, et al. Front Immunol. 2020	32508817
AD & SARS-CoV2	GSE236562	RNA-Seq	hippocampal formation	32	8		Griggs E, et al. Elife. 2023	37417740
