# Supplementary material for: Investigating the Potential Shared Molecular Mechanisms between COVID-19 and Alzheimer’s Disease via Transcriptomic Analysis
Source: Viruses. 2024 Jan 9;16(1):100. doi: 10.3390/v16010100 (PMC10821526; doi:10.3390/v16010100)
Supplement: Supplementary file 1 [file viruses-16-00100-s001.zip › Table S2.xlsx]

## Sheet: Sheet1
Pathway	Genes included in the pathway	Calu-3		NHBE		COVID19Lung
		PES	p-value	PES	p-value	PES	p-value
ABC transporters	ABCA1, ABCA2, ABCA7, ABCC2, ABCG1, ABCG2, TAP2	4.8569	2.45e-05	0	0.27348	0	0.443246
Adhesion and diapedesis of granulocytes	CXCL8, ICAM1, IL1A, TNF	6.79965	1.59e-06	5.12443	0.00068428	3.22629	0.197799
Adhesion and diapedesis of lymphocytes	CXCL8, ICAM1, IL1A	6.79965	3.21e-05	6.83258	3.2e-05	4.30172	0.0981086
Adipocytokine signaling pathway	CD36, IRS1, PCK1, PPARA, RXRA, TNF, TRAF2	3.88552	0.00159365	1.95217	0.29889	5.53079	0.000553389
Aminoacyl-tRNA biosynthesis	MT-TG, MT-TH, MT-TL2, MT-TQ, MT-TR, MT-TS2, MT-TT	0	0.271005	0	0.27348	0	0.443246
Antigen processing and presentation	CTSS, HLA-A, HLA-DQB1, HLA-DRA, HLA-DRB1,HLA-DRB5, HSPA5, TAP2, TNF	2.26655	0.116552	0	0.214396	8.60345	6.43e-11
Antigen-dependent B-cell activation	FAS, HLA-DRA, HLA-DRB1, IL10, IL4	2.71986	0.111785	0	0.354644	5.16207	0.00722019
Apoptosis	FAS, IL1A, IL1B, NGF, NTRK1, PIK3R1, TNF, TP53,TRAF2	5.28862	1.06e-07	3.0367	0.0120733	4.30172	0.00432343
B lymphocyte cell surface molecules	CR1, HLA-DRA, HLA-DRB1, ICAM1	3.39983	0.0470533	1.70814	0.558407	9.67888	5.71e-07
Bioactive peptide-induced signaling pathway	CAMK2D, CDK5, GNA11, MAPT, MYLK, PTK2B	3.39983	0.0150488	2.27753	0.196888	4.30172	0.0195664
Calcium signaling pathway	ADRB1, ADRB2, ADRB3, CAMK2D, CHRNA7, GNA11,HTR2A, HTR6, LHCGR, MYLK, NOS1, NOS3, PTK2B	2.0922	0.104122	1.57675	0.392205	1.98541	0.305128
Catecholamine biosynthesis, tyrosine →dopamine → noradrenaline → adrenaline	DBH, PNMT	3.39983	0.160105	0	0.558204	0	0.681909
Cell cycle: G1/S check point	CDK1, CDKN2A, GSK3B, TGFB1, TP53	5.43972	4.01e-05	1.36652	0.734896	0	0.516974
Cells and molecules involved in local acute inflammatory response	CXCL8, ICAM1, IL1A, IL6, TNF	6.79965	8.13e-08	5.46606	4.07e-05	2.58103	0.306534
Cholinergic synapse	CAMK2D, CHAT, CHRNA3, CHRNA4, CHRNA7,CHRNB2, GNA11, GNB3, KCNJ6, PIK3R1	2.0399	0.174642	1.36652	0.632754	1.29052	0.790472
Complement and coagulation cascades	A2M, C4A, C4B, CFH, CR1, F13A1, MBL2, PLAU,SERPINA1	2.26655	0.116552	0.759175	0.765367	2.86782	0.105785
Control of skeletal myogenesis by HDAC and calcium/calmodulin-dependent kinase (CaMK)	IGF1, INS, MEF2A, MEF2C, PIK3R1	2.71986	0.111785	2.73303	0.110009	0	0.516974
CTCF: first multivalent nuclear factor	CDKN2A, PIK3R1, TGFB1, TP53	5.09974	0.000690603	1.70814	0.558407	0	0.562176
CTL-mediated immune response against target cells	FAS, HLA-A, ICAM1	4.5331	0.011306	2.27753	0.360531	4.30172	0.0981086
cytokine network	CXCL8, IL10, IL12A, IL12B, IL18, IL1A, IL4, IL6, TNF	4.5331	1.18e-05	2.27753	0.114726	2.86782	0.105785
Cytokine–cytokine receptor interaction	CCL2, CCL3, CCR2, CXCL8, FAS, IL10, IL12A, IL12B, IL18,IL1A, IL1B, IL23R, IL4, IL6, IL6R, NGFR, TGFB1, TNF, VEGFA	3.93664	1.29e-07	2.15766	0.0390015	3.3961	0.00272821
Cytokines and inflammatory response	CXCL8, HLA-DRA, HLA-DRB1, IL10, IL12A, IL12B, IL1A, IL4,IL6, TGFB1, TNF	3.7089	0.00020541	1.86343	0.238631	4.69279	0.000429243
Dendritic cells in regulating TH1 and TH2 Development	CD33, IL10, IL12A, IL12B, IL4, TLR2, TLR4, TLR9	1.69991	0.4144	0.854072	0.864611	1.61315	0.615965
Dopaminergic synapse	CAMK2D, CLOCK, COMT, DRD4, GNB3, GRIN2B,GSK3B, KCNJ6, MAOA, PPP2R2B, SLC6A3	1.85445	0.242424	1.24229	0.740427	0	0.336509
Drug metabolism—cytochrome P450	CYP2D6, GSTM1, GSTM3, GSTO1, GSTO2, GSTP1,GSTT1, MAOA	3.88552	0.00159365	0.976083	0.979144	1.8436	0.518583
Erythrocyte differentiation pathway	CCL3, IGF1, IL1A, IL6, TGFB1	2.71986	0.111785	2.73303	0.110009	5.16207	0.00722019
Fat digestion and absorption	ABCA1, APOA1, APOA4, CD36, PLA2G3	1.35993	0.7411	1.36652	0.734896	0	0.516974
Fcε RI signaling pathway	FCER1G, GAB2, IL4, INPP5D, PIK3R1, PLA2G4A,SOS2, TNF	4.24978	0.000144563	1.70814	0.408869	1.61315	0.615965
Free radical induced apoptosis	CXCL8, GPX1, SOD1, TNF	6.79965	1.59e-06	1.70814	0.558407	3.22629	0.197799
Glutathione metabolism	GPX1, GSTM1, GSTM3, GSTO1, GSTO2, GSTP1, GSTT1	5.66638	2.28e-06	0	0.310627	4.30172	0.0195664
Hematopoietic cell lineage	CD14, CD33, CD36, CD44, CR1, HLA-DRA, HLA-DRB1,HLA-DRB5, IL1A, IL1B, IL4, IL6, IL6R, MME, TNF	3.62648	2.67e-05	2.73303	0.00602802	5.16207	3.9e-06
HIF-1 signaling pathway	CAMK2D, EIF4EBP1, GAPDH, HMOX1, IGF1, IL6, IL6R, INS,NOS3, PIK3R1, RPS6KB2, TF, TLR4, VEGFA	3.39983	0.000208802	2.44021	0.0271754	1.8436	0.362273
IL-10 anti-inflammatory signaling pathway	HMOX1, IL10, IL1A, IL6, TNF	5.43972	4.01e-05	2.73303	0.110009	5.16207	0.00722019
IL-5 signaling pathway	HLA-DRA, HLA-DRB1, IL1B, IL4, IL6	4.07979	0.00438369	2.73303	0.110009	7.7431	1.4e-05
Intestinal immune network for IgA production	HLA-DQB1, HLA-DRA, HLA-DRB1, HLA-DRB5, IL10, IL4, IL6,TGFB1	1.69991	0.4144	0.854072	0.864611	6.45259	9.23e-06
Lck and Fyn tyrosine kinases in initiation of TCR activation	HLA-DRA, HLA-DRB1, LCK	2.26655	0.364509	0	0.473336	8.60345	0.000143704
MAPK signaling pathway	BDNF, CD14, FAS, FGF1, IL1A, IL1B, MAPK8IP1, MAPT,MEF2C, NGF, NTF3, NTRK1, NTRK2, PLA2G4A, SOS2,TGFB1, TNF, TP53, TRAF2	4.6524	5.26e-11	1.43844	0.432673	3.3961	0.00272821
Mechanism of gene regulation by peroxisome proliferators via PPARα	APOA1, CD36, INS, LPL, PIK3R1, PPARA, PTGS2, RXRA,SP1, TNF	3.39983	0.00171094	2.04977	0.171895	2.58103	0.148984
Metabolism of xenobiotics by cytochrome P450	CYP2D6, GSTM1, GSTM3, GSTO1, GSTO2, GSTP1,GSTT1, HSD11B1	4.8569	2.45e-05	0.976083	0.979144	1.8436	0.518583
mTOR signaling pathway	EIF4EBP1, IGF1, INS, IRS1, PIK3R1, RPS6KB2, TNF,VEGFA	3.39983	0.00501217	1.70814	0.408869	1.61315	0.615965
Neurotrophin signaling pathway	BDNF, CAMK2D, GSK3B, IRS1, NGF, NGFR, NTF3, NTRK1,NTRK2, PIK3R1, PSEN1, PSEN2, SOS2, TP53, TP73	3.62648	2.67e-05	0.911011	0.887034	1.72069	0.420465
NF-κB signaling pathway	CD14, CXCL8, ICAM1, IL1B, LCK, PARP1, PLAU, PTGS2, TLR4,TNF, TRAF2, UBE2I	5.66638	2.5e-11	3.41629	0.000614044	2.15086	0.249852
NOD-like receptor signaling pathway	CARD8, CCL2, CXCL8, IL18, IL1B, IL6, MEFV, NLRP1,NLRP3, TNF	5.43972	6.64e-09	2.73303	0.0243755	3.87155	0.00889735
Notch signaling pathway	APH1A, APH1B, NCSTN, PSEN1, PSEN2, PSENEN	5.66638	2.28e-06	0	0.310627	8.60345	8.54e-08
Osteoclast differentiation	GAB2, IL1A, IL1B, LCK, PIK3R1, PPARG, TGFB1, TNF,TRAF2, TREM2	4.07979	5.7e-05	3.41629	0.0017306	3.87155	0.00889735
Ovarian steroidogenesis	ALOX5, CYP19A1, FSHR, IGF1, INS, LDLR, LHCGR, PLA2G4A,PTGS2, STAR	2.71986	0.0246282	1.36652	0.632754	2.58103	0.148984
Oxidative phosphorylation	COX10, COX15, MT-ATP6, MT-ATP8, MT-CO1, MT-CO2,MT-CO3, MT-CYB, MT-ND1, MT-ND2, MT-ND3, MT-ND4,MT-ND4L, MT-ND5, MT-ND6	2.71986	0.00595732	0.455505	0.383851	2.58103	0.0777495
Phagosome	CD14, CD36, CTSS, HLA-A, HLA-DQB1, HLA-DRA, HLA-DRB1,HLA-DRB5, MBL2, MPO, NOS1, OLR1, RAB7A, TAP2, TLR2, TLR4	2.54987	0.0104978	0.854072	0.809883	5.64601	1.08e-07
Phosphorylation of MEK1 by cdk5/p35 downregulates the MAP kinase pathway	CDK5, CDK5R1, NGF, NGFR	3.39983	0.0470533	0	0.407702	0	0.562176
PI3K-Akt signaling pathway	COL11A1, EFNA5, EIF4EBP1, FGF1, GNB3, GSK3B, IGF1, IL4,IL6, IL6R, INS, IRS1, NGF, NGFR, NOS3, PCK1, PIK3R1,PPP2R2B, RELN, RPS6KB2, RXRA, SOS2, TLR2, TLR4, TP53,VEGFA, YWHAQ	3.77759	2.79e-09	1.51835	0.270775	1.43391	0.516099
Prolactin signaling pathway	ESR1, ESR2, GSK3B, INS, LHCGR, PIK3R1, SOS2	2.91414	0.0362823	0.976083	0.979144	0	0.443246
Rac 1 cell motility signaling pathway	CDK5, CDK5R1, MYLK, PIK3R1	3.39983	0.0470533	3.41629	0.04625	0	0.562176
Ras signaling pathway	EFNA5, EXOC2, FGF1, GAB2, GNB3, GRIN2B, IGF1,INS, NGF, NGFR, PIK3R1, PLA2G3, PLA2G4A, SOS2,VEGFA	3.62648	2.67e-05	1.82202	0.191081	1.72069	0.420465
Ras-independent pathway in NK cell-mediated cytotoxicity	HLA-A, IL18, PIK3R1, PTK2B	5.09974	0.000690603	1.70814	0.558407	6.45259	0.00164397
Regulation of hematopoiesis by cytokines	CXCL8, IL4, IL6	4.5331	0.011306	4.55505	0.0110947	0	0.615691
Regulation of PGC-1a	CAMK2D, MEF2A, MEF2C, PPARA	1.69991	0.563701	3.41629	0.04625	3.22629	0.197799
Role of ERBB2 in signal transduction and oncology	ESR1, IL6, IL6R, PIK3R1	3.39983	0.0470533	5.12443	0.00068428	0	0.562176
Role of Erk5 in neuronal survival	MEF2A, MEF2C, NTRK1, PIK3R1	3.39983	0.0470533	3.41629	0.04625	0	0.562176
Selective expression of chemokine receptors during T-cell polarization	CCL3, CCR2, IL12A, IL12B, IL4, TGFB1	1.13328	0.89513	0	0.310627	4.30172	0.0195664
Serotonergic synapse	ALOX5, APP, CYP2D6, GNB3, HTR2A, HTR6, KCNJ6,MAOA, PLA2G4A, PTGS2, SLC6A4	2.4726	0.0436616	1.24229	0.740427	2.34639	0.197425
Signal transduction through IL-1R	IL1A, IL1B, IL1RN, IL6, TGFB1, TNF	5.66638	2.28e-06	4.55505	0.000346448	6.45259	0.000119154
Stress induction of HSP regulation	FAS, IL1A, TNF	6.79965	3.21e-05	2.27753	0.360531	4.30172	0.0981086
Th1/Th2 differentiation	HLA-DRA, HLA-DRB1, IL12A, IL12B, IL18, IL4	3.39983	0.0150488	0	0.310627	6.45259	0.000119154
The co-stimulatory signal during T-cell activation	HLA-DRA, HLA-DRB1, LCK, PIK3R1	3.39983	0.0470533	1.70814	0.558407	6.45259	0.00164397
The IGF-1 receptor and longevity	IGF1, PIK3R1, SOD1, SOD2	5.09974	0.000690603	3.41629	0.04625	0	0.562176
TNF signaling pathway	CCL2, FAS, ICAM1, IL1B, IL6, MAGI2, MMP3, PIK3R1,PTGS2, TNF, TRAF2	5.56335	4.1e-10	3.72686	0.000214545	3.51959	0.0160693
Toll-like receptor signaling pathway	CCL3, CD14, CXCL8, IL12A, IL12B, IL1B, IL6, PIK3R1, TLR2,TLR4, TLR9, TNF	4.5331	4.31e-07	2.84691	0.00871716	3.22629	0.0263064
Trka receptor signaling pathway	NGF, NTRK1, PIK3R1	2.26655	0.364509	2.27753	0.360531	0	0.615691
